# Supplementary material for: Nitrogen-doped porous carbon from biomass with superior catalytic performance for acetylene hydrochlorination
Source: Royal Society of Chemistry journal article supplement (doi:10.1039/d0ra00475h), 2020-01-01
Supplement: d0ra00475h1.pdf [file d0ra00475h1.pdf]

# **A Nitrogen-Doped Porous Carbon from Biomass with Superior Catalytic Performance for Acetylene Hydrochlorination**

Zhaobing Shen,<sup>a, b</sup> Yue Liu,<sup>b</sup> Yejun Han,<sup>b</sup> Yejun Qin,<sup>a</sup> Jinhua Li,<sup>a</sup> Ping Xing,<sup>a</sup> Biao Jiang\*<sup>a, b</sup>

- a. Shanghai Green Chemical Engineering Research Centre, Shanghai Institute of Organic Chemistry, Chinese Academy of Sciences, No. 345 Lingling Road, Shanghai, P. R. China.
- b. Green Chemical Engineering Research Centre, Shanghai Advanced Research Institute, Chinese Academy of Sciences, No. 99 Haike Road, Zhangjiang Hi-Tech Park, Pudong Shanghai, P. R. China

**E-mail: [jiangb@sioc.ac.cn](mailto:jiangb@sioc.ac.cn)**

| Reference        | Catalyst                 | T (°C) | GHSV <sup>a</sup><br>(h <sup>-1</sup> ) | X <sub>acetylene</sub> <sup>b</sup><br>(%) | S <sub>VCM</sub> <sup>c</sup><br>(%) | S <sub>BET</sub> <sup>d</sup> (m <sup>2</sup><br>g <sup>-1</sup> ) | N <sup>e</sup><br>(wt %) | STY <sup>f</sup> (g <sub>VCM</sub> h <sup>-1</sup><br>mL <sup>-1</sup> ) | STY/(S <sub>BET</sub> g <sub>N</sub> ) <sup>g</sup> (g <sub>VCM</sub><br>h <sup>-1</sup> mL <sup>-1</sup> m <sup>-2</sup> g <sup>-1</sup> ) |
|------------------|--------------------------|--------|-----------------------------------------|--------------------------------------------|--------------------------------------|--------------------------------------------------------------------|--------------------------|--------------------------------------------------------------------------|---------------------------------------------------------------------------------------------------------------------------------------------|
| 1                | B,N-G                    | 150    | 36                                      | 80                                         | 98                                   | N                                                                  | 10.9                     | 0.08                                                                     | N                                                                                                                                           |
| 2                | g-C3N4@AC                | 180    | 50                                      | 65                                         | 98                                   | 874                                                                | 8.6                      | 0.09                                                                     | 1.19E-03                                                                                                                                    |
| 3                | PANI-doped carbon        | 180    | 36                                      | 72                                         | 98                                   | 592                                                                | 1.9                      | 0.07                                                                     | 6.32E-03                                                                                                                                    |
| 4                | MOF-doped carbon         | 180    | 50                                      | 80                                         | 98                                   | 1665                                                               | 1.6                      | 0.11                                                                     | 4.12E-03                                                                                                                                    |
| 5                | N-OMC                    | 180    | 50                                      | 34                                         | 98                                   | 613                                                                | 3.9                      | 0.05                                                                     | 1.95E-03                                                                                                                                    |
| 6                | AC-n-U500                | 180    | 30                                      | 75                                         | 98                                   | 1082                                                               | 4                        | 0.06                                                                     | 1.43E-03                                                                                                                                    |
| 7                | S, N doped carbon        | 180    | 50                                      | 80                                         | 98                                   | 49.1                                                               | 7.9                      | 0.11                                                                     | 2.83E-02                                                                                                                                    |
| 8                | TPPB@SAC                 | 180    | 50                                      | 83                                         | 98                                   | N                                                                  | N                        | 0.11                                                                     | N                                                                                                                                           |
| 9                | Si@N-C                   | 200    | 30                                      | 80                                         | 98                                   | 281                                                                | 7.1                      | 0.07                                                                     | 3.30E-03                                                                                                                                    |
| 10               | p-BN                     | 200    | 40                                      | 72                                         | 96                                   | N                                                                  | N                        | 0.08                                                                     | N                                                                                                                                           |
| 11               | TPPB@SAC                 | 200    | 30                                      | 92                                         | 98                                   | 873                                                                | N                        | 0.08                                                                     | N                                                                                                                                           |
| 12               | PAN-derived catalyst     | 200    | 30                                      | 75                                         | 98                                   | 12                                                                 | 18.5                     | 0.06                                                                     | 2.78E-02                                                                                                                                    |
| 13               | g-C3N4                   | 200    | 30                                      | 90                                         | 98                                   | 47.9                                                               | 29.4                     | 0.07                                                                     | 5.26E-03                                                                                                                                    |
| 14               | N-MC-G                   | 220    | 30                                      | 80                                         | 98                                   | 582                                                                | 4.2                      | 0.07                                                                     | 2.69E-03                                                                                                                                    |
| 15               | ZIF-8/SAC                | 220    | 30                                      | 80                                         | 98                                   | 1058                                                               | 1.1                      | 0.07                                                                     | 5.66E-03                                                                                                                                    |
| 16               | NPC                      | 220    | 1.7 <sup>h</sup>                        | 85                                         | 98                                   | 443                                                                | 2.5                      | N                                                                        | N                                                                                                                                           |
| 17               | Defective N-doped carbon | 220    | 36                                      | 80                                         | 98                                   | 295                                                                | 2.4                      | 0.08                                                                     | 1.12E-02                                                                                                                                    |
| 18               | ND@G                     | 220    | 30                                      | 85                                         | 98                                   | 382                                                                | N                        | 0.07                                                                     | N                                                                                                                                           |
| 19               | NR@CAC                   | 220    | 30                                      | 96                                         | 98                                   | 703                                                                | 3.4                      | 0.08                                                                     | 3.31E-03                                                                                                                                    |
| 20               | D-AC-M                   | 220    | 30                                      | 60                                         | 98                                   | 1191                                                               | 1.9                      | 0.05                                                                     | 2.18E-03                                                                                                                                    |
| 21               | NC-2                     | 220    | 50                                      | 97                                         | 98                                   | 301                                                                | 9.7                      | 0.13                                                                     | 4.56E-03                                                                                                                                    |
| 22               | PSAC-N                   | 250    | 30                                      | 90                                         | 98                                   | 936                                                                | 4.9                      | 0.07                                                                     | 1.62E-03                                                                                                                                    |
| 23               | 13X zeolite              | 320    | 60                                      | 85                                         | 98                                   | 501                                                                |                          | 0.14                                                                     | N                                                                                                                                           |
| <b>This work</b> | SBMC                     | 180    | 50                                      | 80                                         | 98                                   | 1038                                                               | 6.9                      | 0.11                                                                     | 1.53E-03                                                                                                                                    |
|                  | SBMC                     | 200    | 50                                      | 87                                         | 98                                   | 1038                                                               | 6.9                      | 0.12                                                                     | 1.67E-03                                                                                                                                    |
|                  | SBMC                     | 220    | 50                                      | 95                                         | 98                                   | 1038                                                               | 6.9                      | 0.13                                                                     | 1.82E-03                                                                                                                                    |

<sup>a</sup> C<sub>2</sub>H<sub>2</sub> GHSV; <sup>b</sup> conversion of acetylene; <sup>c</sup> selectivity for VCM; <sup>d</sup> the specific area of catalysts; <sup>e</sup> nitrogen atom content on the catalysts by XPS; <sup>f</sup> the space-time yield of VCM; <sup>g</sup> the value of STY was normalized by the surface area and nitrogen contents; <sup>h</sup> the GHSV is 1.7 mL g<sup>-1</sup> h<sup>-1</sup>.

**Table S1.** Comparison of catalytic performance among the previous works and SBMC

Table S2

| Reference        | Catalyst                 | T (°C)     | X <sub>A</sub> <sup>a</sup> (%) | X <sub>A</sub> <sup>b</sup> (%) | t <sup>c</sup> (h) | deactivation rate <sup>d</sup> (%) |
|------------------|--------------------------|------------|---------------------------------|---------------------------------|--------------------|------------------------------------|
| 1                | B,N-G                    | 150        | 95                              | 80                              | 2                  | 7.500                              |
| 2                | g-C3N4@AC                | 180        | 75                              | 65                              | 7                  | 1.429                              |
| 3                | PANI-doped carbon        | 180        | 76                              | 72                              | 9                  | 0.444                              |
| 4                | MOF-doped carbon         | 180        | 60                              | 46                              | 50                 | 0.280                              |
| 5                | N-OMC                    | 180        | 35                              | 30                              | 20                 | 0.250                              |
| 6                | AC-n-U500                | 180        | 22                              | 21                              | 20                 | 0.050                              |
| 7                | S, N doped carbon        | 180        | 82                              | 78                              | 9                  | 0.444                              |
| 8                | TPPB@SAC                 | 180        | 84                              | 81                              | 40                 | 0.075                              |
| 9                | Si@N-C                   | 200        | 82                              | 80                              | 100                | 0.020                              |
| 10               | p-BN                     | 200        | 100                             | 95                              | 1000               | 0.005                              |
| 11               | TPPB@SAC                 | 220        | 97                              | 94                              | 300                | 0.010                              |
| 12               | PAN-derived catalyst     | 280        | 88                              | 82                              | 200                | 0.030                              |
| 13               | g-C3N4                   | 220        | 94                              | 92                              | 40                 | 0.050                              |
| 14               | N-MC-G                   | 220        | 80                              | 80                              | 100                | 0.000                              |
| 15               | ZIF-8/SAC                | 220        | 81                              | 76                              | 150                | 0.033                              |
| 16               | NPC                      | 260        | 96                              | 85                              | 20                 | 0.550                              |
| 17               | Defective N-doped carbon | 220        | 96                              | 75                              | 14                 | 1.500                              |
| 18               | ND@G                     | 220        | 82                              | 80                              | 200                | 0.010                              |
| 19               | NR@CAC                   | 220        | 95                              | 92                              | 200                | 0.015                              |
| 20               | D-AC-M                   | 220        | 60                              | 60                              | 90                 | 0.000                              |
| 21               | NC-2                     | 220        | 98                              | 88                              | 50                 | 0.200                              |
| 22               | PSAC-N                   | 250        | 70                              | 58                              | 160                | 0.075                              |
| 23               | 13X zeolite              | 320        | 95                              | 77                              | 6                  | 3.000                              |
| <b>This work</b> | <b>SBMC</b>              | <b>200</b> | <b>99</b>                       | <b>96</b>                       | <b>110</b>         | <b>0.027</b>                       |

<sup>a</sup> the initial conversion of acetylene; <sup>b</sup> the final conversion of acetylene; <sup>c</sup> reaction time; <sup>d</sup> the deactivation rate of the catalysts.

Comparison of catalytic stability among the previous works and SBMC
